# Supplementary material for: H2-production and electron-transfer mechanism of a noble-metal-free WO3@ZnIn2S4 S-scheme heterojunction photocatalyst
Source: Royal Society of Chemistry journal article supplement (doi:10.1039/d2ta05181h), 2022-01-01
Supplement: d2ta05181h1.pdf [file d2ta05181h1.pdf]

## Supporting information

### **H<sub>2</sub>-production and electron-transfer mechanism of noble-metal-free WO<sub>3</sub>@ZnIn<sub>2</sub>S<sub>4</sub> S-scheme heterojunction photocatalyst**

*Shuang Cao,<sup>a</sup> Jianguo Yu,<sup>a,b</sup> Swelm Wageh,<sup>c,\*</sup> Ahmed A. Al-Ghamdi,<sup>c</sup> Mitra Mousavi,<sup>d</sup>*

*Jahan B. Ghasemi<sup>d</sup> and Feiyan Xu<sup>b,\*</sup>*

<sup>a</sup> State Key Laboratory of Advanced Technology for Materials Synthesis and Processing,  
Wuhan University of Technology, Luoshi Road 122, Wuhan, 430070, P.R. China

<sup>b</sup> Laboratory of Solar Fuel, Faculty of Materials Science and Chemistry, China University  
of Geosciences, Lumo Road 388, Wuhan, 430074, P. R. China

<sup>c</sup> Department of Physics, Faculty of Science, King Abdulaziz University, Jeddah 21589,  
Saudi Arabia

<sup>d</sup> School of Chemistry, College of Science, University of Tehran, P.O. Box 14155-6455,  
Tehran, Iran

\* E-mail: [xufeyan@cug.edu.cn](mailto:xufeyan@cug.edu.cn); [wswelm@kau.edu.sa](mailto:wswelm@kau.edu.sa)

## 1. Experimental section

### 1.1 Chemicals

Tungsten hexachloride ( $\text{WCl}_6$ ), Indium chloride ( $\text{InCl}_3 \cdot x\text{H}_2\text{O}$ ), 5,5-Dimethyl-1-pyrroline N-oxide (DMPO) were purchased from Macklin Reagent Co., Ltd. Polyacrylonitrile (PAN,  $M_w = 150,000$ ), thioacetamide (TAA), N, N-Dimethylformamide (DMF), zinc chloride and ethanol were purchased from Sinopharm Chemical Reagent Co., Ltd. All the reagents were analytical grade and used without further purification.

### 1.2 Characterizations

Field emission scanning electron microscope (FESEM) and transmission electron microscopy (TEM) images were observed on JSM 7500F and Talos F200S, respectively. X-Ray diffraction (XRD) patterns were performed on a Shimadzu X-ray diffractometer (XRD-6100, Japan) with Cu  $K\alpha$  radiation. UV-visible diffuse reflectance spectra (DRS) were obtained on a Shimadzu UV-2600 UV-visible spectrophotometer (Japan). The Brunauer-Emmett-Teller (BET) specific surface area ( $S_{\text{BET}}$ ) and pore size distribution of the powders were obtained by nitrogen adsorption in a nitrogen adsorption apparatus (TriStar II 3020, Micromeritics, USA). X-ray photoelectron spectroscopy (XPS) was performed on a Thermo ESCALAB 210 XPS spectrometer system (UK) with Al  $K\alpha$  radiation. *In-situ* XPS measurements were conducted under the same condition except that light irradiation was introduced. Time-resolved photoluminescence (TRPL) spectra

was recorded on a fluorescence lifetime spectrophotometer (FLS 1000, Edinburgh, UK) at an excitation wavelength of 325 nm. The average decay time ( $\tau_a$ ) was calculated from the following formula:

$$\tau_a = \frac{A_1\tau_1^2 + A_2\tau_2^2 + A_3\tau_3^2}{A_1\tau_1 + A_2\tau_2 + A_3\tau_3} \quad (1)$$

Electrochemical measurements were conducted using an electrochemical analyzer (CHI660C Instruments, Shanghai) in a standard three-electrode system. Pt wire, Ag/AgCl (saturating KCl) and 0.5 M Na<sub>2</sub>SO<sub>4</sub> solution functioned as the counter electrode, reference electrode and electrolyte, respectively. For the working electrode, 20 mg of photocatalysts were dispersed in 1.0 mL of ethanol and 10  $\mu$ L of Nafion solution to make slurry, which was then coated onto F-doped SnO<sub>2</sub>-coated (FTO) glass electrode with an exposed area of *ca.* 1 cm<sup>2</sup>. Afterward, the electrode was dried in an oven at 60 °C for 1 h.

### ***1.3 Apparent quantum yield (AQY) calculation***

The apparent quantum yield (AQY) was measured under the same photocatalytic reaction conditions except using monochromatic light of 420 nm as the light source. The light intensity was measured as 3 mW/cm<sup>2</sup> and the irradiation area was determined to be 1 cm<sup>2</sup>.

The number of incident photons and the AQY were calculated according to the following equations:

$$N = \frac{E\lambda}{hc} = \frac{3 \times 10^{-3} \times 8.5 \times 3600 \times 420 \times 10^{-9}}{6.626 \times 10^{-34} \times 3 \times 10^8} = 1.94 \times 10^{20}$$

(2)

$$AQY = \frac{2 \times \text{the number of evolved } H_2}{\text{the number of incident photons}} \times 100 = \frac{2 \times 3.5 \times 10^{23} \times 10 \times 10^{-6}}{1.94 \times 10^{20}} \times 100 = 3.61\%$$

(3)

#### **1.4 Band structure ( $E_g$ , $E_C$ and $E_V$ ) calculation**

The band structure ( $E_{CBM}$ ,  $E_{VBM}$  and  $E_g$ ) of  $WO_3$  and  $ZnIn_2S_4$  was calculated according to the following empirical formulas:

$$\alpha h\nu = A(h\nu - E_g)^{n/2} \quad (4)$$

$$E_{VBM} = E_{FP} + E_{cutoff} \quad (5)$$

$$E_{CBM} = E_g - E_{VBM} \quad (6)$$

where  $\alpha$ ,  $E_g$ , and  $h\nu$  represent the absorption index, energy gap and photon energy, respectively. As for  $n$ , different types of semiconductors have different  $n$  values. The  $n$  values of indirect band gap semiconductors and direct band gap semiconductors are 4 and 1, respectively.  $E_{FP}$  represents the flat band potential while  $E_{cutoff}$  stands for the cutoff edge obtained from VB XPS spectra.

## 2. Supporting Figures

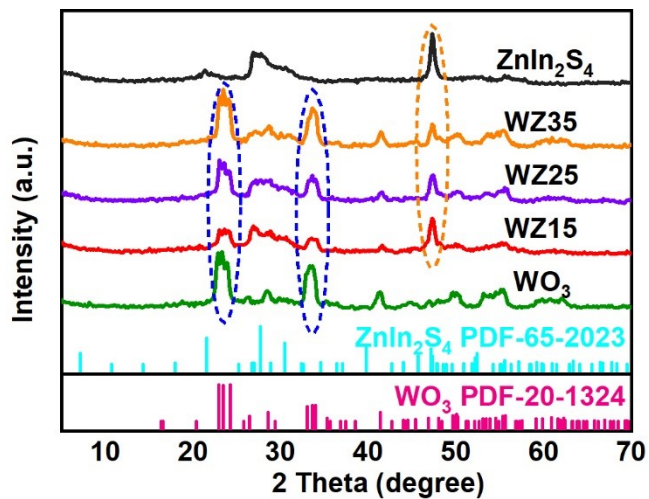

**Fig. S1** XRD patterns of  $\text{WO}_3$ ,  $\text{ZnIn}_2\text{S}_4$  and  $\text{WZ}_x$ .  $\text{WZ}_x$  represents the  $\text{WO}_3@ZnIn_2S_4$  composite, where W and Z represent  $\text{WO}_3$  and  $\text{ZnIn}_2\text{S}_4$ , respectively;  $x$  indicates the molar percentage of  $\text{WO}_3$  with respect to  $\text{ZnIn}_2\text{S}_4$ .

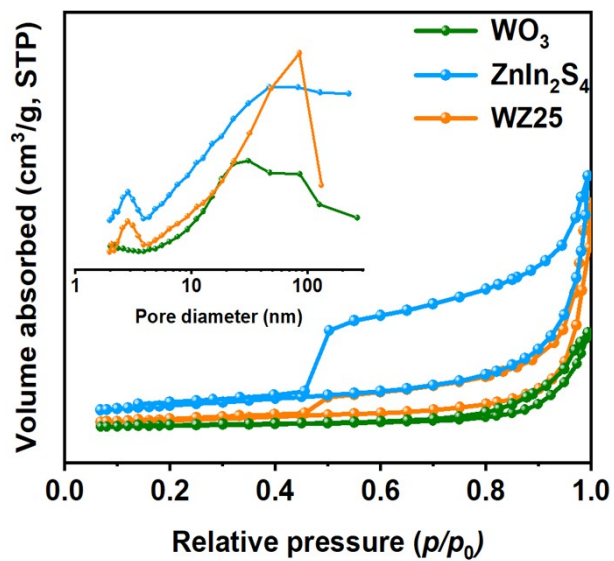

Fig. S2 Nitrogen adsorption-desorption isotherms and the corresponding pore size distribution (inset) of  $\text{WO}_3$ ,  $\text{ZnIn}_2\text{S}_4$  and WZ25. WZ25 represents the  $\text{WO}_3@ZnIn_2\text{S}_4$  composite, where W and Z represent  $\text{WO}_3$  and  $\text{ZnIn}_2\text{S}_4$ , respectively; 25 indicates the molar percentage of  $\text{WO}_3$  with respect to  $\text{ZnIn}_2\text{S}_4$ .

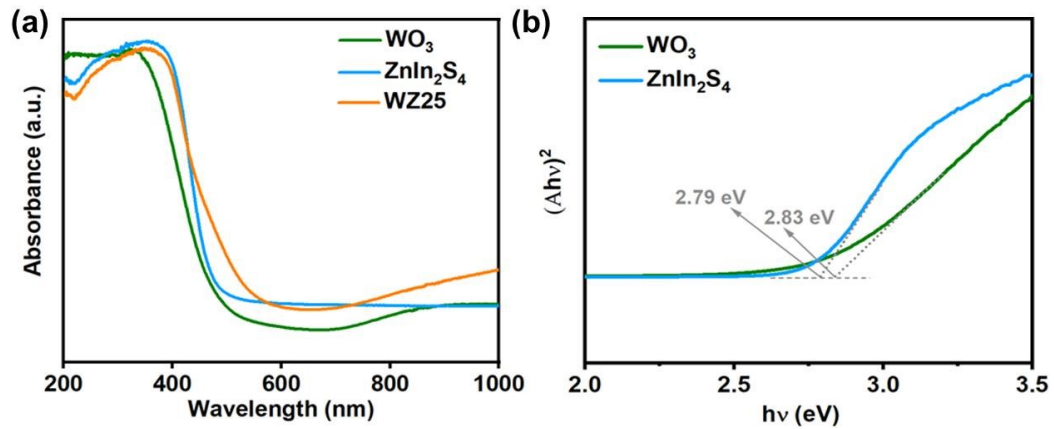

**Fig. S3** (a) UV-vis spectra of  $\text{WO}_3$ ,  $\text{ZnIn}_2\text{S}_4$  and  $\text{WZ25}$ , (b) Kubelka-Munk plots of  $\text{WO}_3$  and  $\text{ZnIn}_2\text{S}_4$ .  $\text{WZ25}$  represents the  $\text{WO}_3@\text{ZnIn}_2\text{S}_4$  composite, where W and Z represent  $\text{WO}_3$  and  $\text{ZnIn}_2\text{S}_4$ , respectively; 25 indicates the molar percentage of  $\text{WO}_3$  with respect to  $\text{ZnIn}_2\text{S}_4$ .

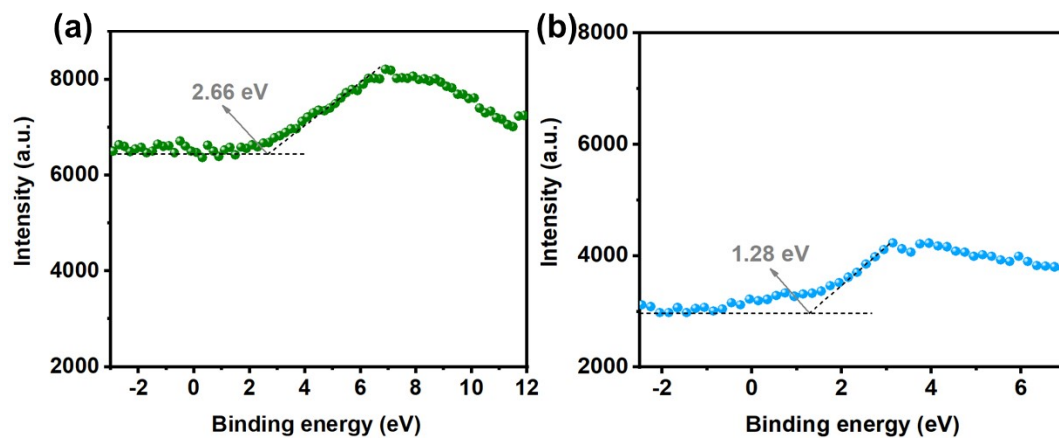

**Fig. S4** Valence band XPS spectra of (a)  $\text{WO}_3$  and (b)  $\text{ZnIn}_2\text{S}_4$ .



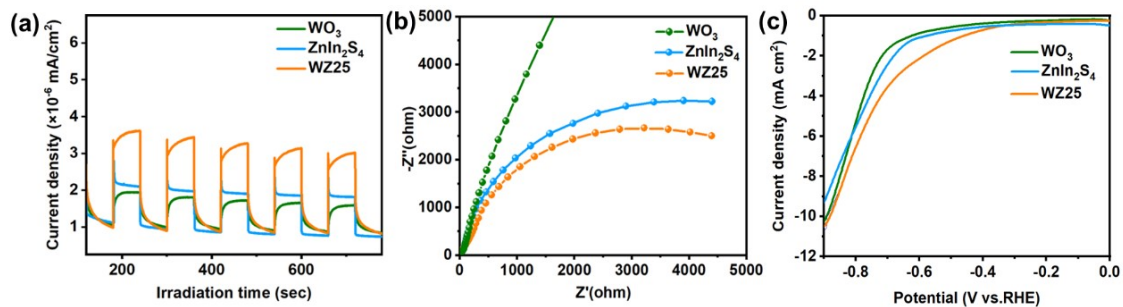

**Fig. S5** (a) Transient photocurrent response, (b) Nyquist plots and (c) polarization curves of WO<sub>3</sub>, ZnIn<sub>2</sub>S<sub>4</sub> and WZ25. WZ25 represents the WO<sub>3</sub>@ZnIn<sub>2</sub>S<sub>4</sub> composite, where W and Z represent WO<sub>3</sub> and ZnIn<sub>2</sub>S<sub>4</sub>, respectively; 25 is the molar percentages of WO<sub>3</sub> with respect to ZnIn<sub>2</sub>S<sub>4</sub>.

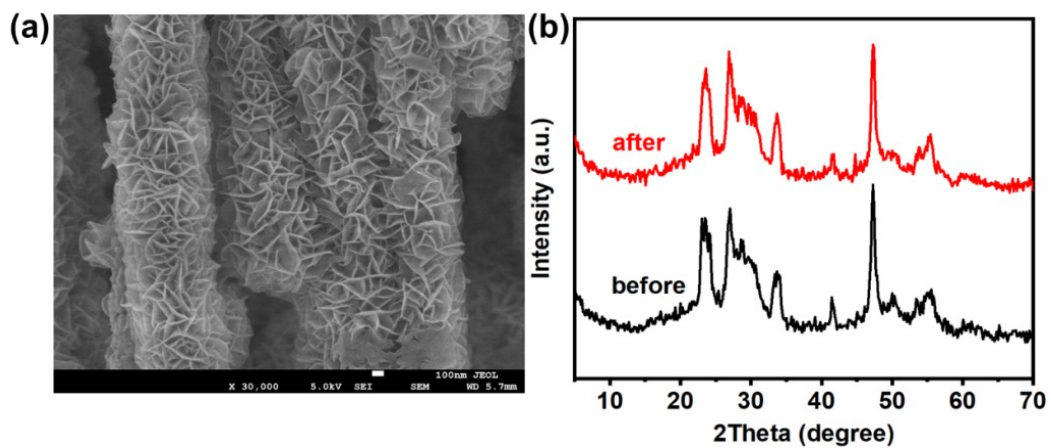

**Fig. S6** (a) FESEM and (b) XRD pattern of WZ25 after cycle photocatalytic reactions.

WZ25 represents the WO<sub>3</sub>@ZnIn<sub>2</sub>S<sub>4</sub> composite, where W and Z represent WO<sub>3</sub> and ZnIn<sub>2</sub>S<sub>4</sub>, respectively; 25 is the molar percentages of WO<sub>3</sub> with respect to ZnIn<sub>2</sub>S<sub>4</sub>.

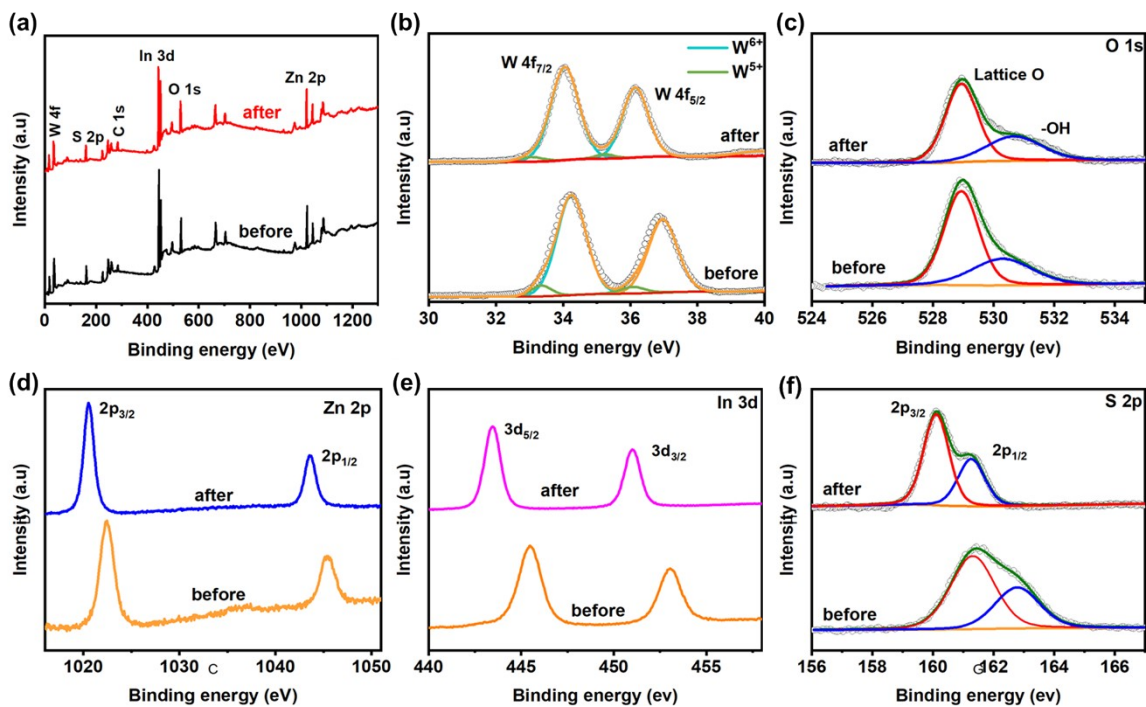

**Fig. S7** (a) XPS survey spectra, XPS spectra of (b) W 4f and (c) O 1s, (d) Zn 2p, (e) In 3d and (f) S 2p of WZ25 before and after cycled photocatalytic reactions. WZ25 represents the  $\text{WO}_3@\text{ZnIn}_2\text{S}_4$  composite, where W and Z represent  $\text{WO}_3$  and  $\text{ZnIn}_2\text{S}_4$ , respectively; 25 is the molar percentages of  $\text{WO}_3$  with respect to  $\text{ZnIn}_2\text{S}_4$ .

### 3. Supporting Tables

**Table S1.** Physical properties of WO<sub>3</sub>, ZnIn<sub>2</sub>S<sub>4</sub> and WZ25.

| <b>Samples</b>                       | <b><math>S_{\text{BET}}</math> (m<sup>2</sup> g<sup>-1</sup>)</b> | <b><math>d_{\text{pore}}</math> (nm)</b> | <b><math>V_{\text{pore}}</math> (cm<sup>3</sup> g<sup>-1</sup>)</b> |
|--------------------------------------|-------------------------------------------------------------------|------------------------------------------|---------------------------------------------------------------------|
| <b>WO<sub>3</sub></b>                | 9                                                                 | 17                                       | 0.04                                                                |
| <b>ZnIn<sub>2</sub>S<sub>4</sub></b> | 36                                                                | 10                                       | 0.09                                                                |
| <b>WZ25</b>                          | 17                                                                | 12                                       | 0.05                                                                |

**Table S2.** The fitted lifetimes obtained from decay curves of  $\text{WO}_3$  and WZ25 dispersed in DMF under argon atmosphere. WZ25 represents the  $\text{WO}_3@\text{ZnIn}_2\text{S}_4$  composite, where W and Z represent  $\text{WO}_3$  and  $\text{ZnIn}_2\text{S}_4$ , respectively; 25 is the molar percentages of  $\text{WO}_3$  with respect to  $\text{ZnIn}_2\text{S}_4$ .

| <b>Sample</b>                   | <b><math>\tau_1</math> (ns)</b> | <b><math>\tau_2</math> (ns)</b> | <b><math>\tau_3</math> (ns)</b> |
|---------------------------------|---------------------------------|---------------------------------|---------------------------------|
| <b><math>\text{WO}_3</math></b> | 1.19                            | 2.08                            | 34.98                           |
| <b>WZ25</b>                     | 0.91                            | 2.05                            | 24.53                           |

**Table S3.** Comparison of photocatalytic H<sub>2</sub> generation performance of various photocatalysts with and without noble metal cocatalysts.

| Catalyst                                                            | Cocatalyst | Hole scavenger                        | H <sub>2</sub> evolution rate<br>( $\mu\text{mol h}^{-1} \text{g}^{-1}$ ) | Ref. |
|---------------------------------------------------------------------|------------|---------------------------------------|---------------------------------------------------------------------------|------|
| WO <sub>3</sub> @ZnIn <sub>2</sub> S <sub>4</sub>                   | None       | TEOA                                  | 8500                                                                      | This |
| WO <sub>3</sub> /g-C <sub>3</sub> N <sub>4</sub>                    | Pt         | Lactic acid                           | 982                                                                       | 1    |
| g-C <sub>3</sub> N <sub>4</sub> /TiO <sub>2</sub> /IrO <sub>x</sub> | Pt         | Methanol                              | 8150                                                                      | 2    |
| g-C <sub>3</sub> N <sub>4</sub> /Onion-like carbon                  | Pt         | TEOA                                  | 3086                                                                      | 3    |
| CuInS <sub>2</sub> /ZnIn <sub>2</sub> S <sub>4</sub>                | Pt         | 0.35 M NaS <sub>2</sub><br>and 0.25 M | 3430                                                                      | 4    |
| TiO <sub>2</sub> /ZnIn <sub>2</sub> S <sub>4</sub>                  | Pd         | TEOA                                  | 5350                                                                      | 5    |
| Black phosphorus/Bi <sub>2</sub> WO <sub>6</sub>                    | Pt         | TEOA                                  | 4208                                                                      | 6    |
| Ta <sub>3</sub> N <sub>5</sub> /BaTaO <sub>2</sub> N                | Pt         | methanol                              | 182                                                                       | 7    |
| Covalent triazine frameworks-Benzothiadiazole/Thio                  | Pt         | TEOA                                  | 6608                                                                      | 8    |
| SnO <sub>2</sub> /UiO-66-NH <sub>2</sub>                            | Pt         | Trimethylamine                        | 2167                                                                      | 9    |
| SnO <sub>2</sub> /g-C <sub>3</sub> N <sub>4</sub>                   | Au         | Methanol                              | 770                                                                       | 10   |
| Multi-edged TiO <sub>2</sub>                                        | Ru         | Methanol                              | 7200                                                                      | 11   |

## References

- 1 J.W. Fu, Q.L. Xu, J.X. Low, C.J. Jiang, J.G. Yu, Ultrathin 2D/2D WO<sub>3</sub>/g-C<sub>3</sub>N<sub>4</sub> step-scheme H<sub>2</sub>-production photocatalyst, *Appl. Catal. B-Environ.*, 2019, **243**, 556-565.
- 2 H.S. Moon, K.C. Hsiao, M.C. Wu, Y. Yun, Y.J. Hsu, K. Yong, Spatial Separation of Cocatalysts on Z-Scheme Organic/Inorganic Heterostructure Hollow Spheres for Enhanced Photocatalytic H<sub>2</sub> Evolution and In-Depth Analysis of the Charge-Transfer Mechanism, *Adv. Mater.*, 2022, 2200172.
- 3 Y. Shi, Q. Zhao, J. Li, G. Gao, J. Zhi, Onion-like carbon-embedded graphitic carbon nitride for enhanced photocatalytic hydrogen evolution and dye degradation, *Appl. Catal. B-Environ.*, 2022, **308**, 121216.
- 4 Z. Guan, J. Pan, Q. Li, G. Li, J. Yang, Boosting Visible-Light Photocatalytic Hydrogen Evolution with an Efficient CuInS<sub>2</sub>/ZnIn<sub>2</sub>S<sub>4</sub> 2D/2D Heterojunction, *ACS Sustain. Chem. Eng.*, 2019, **7**, 7736-7742.
- 5 P. She, J.S. Qin, J. Sheng, Y. Qi, H. Rui, W. Zhang, X. Ge, G. Lu, X. Song, H. Rao, Dual-Functional Photocatalysis for Cooperative Hydrogen Evolution and Benzylamine Oxidation Coupling over Sandwiched-Like Pd@TiO<sub>2</sub>@ZnIn<sub>2</sub>S<sub>4</sub> Nanobox, *Small*, 2022, **18**, 2105114.
- 6 J. Hu, D. Chen, Z. Mo, N. Li, Q. Xu, H. Li, J. He, H. Xu, J. Lu, Z-Scheme 2D/2D Heterojunction of Black Phosphorus/Monolayer Bi<sub>2</sub>WO<sub>6</sub> Nanosheets with Enhanced Photocatalytic Activities, *Angew. Chem. Int. Edit.*, 2019, **58**, 2073-2077.

- 7 B. Dong, J. Cui, Y. Gao, Y. Qi, F. Zhang, C. Li, Heterostructure of 1D Ta<sub>3</sub>N<sub>5</sub> Nanorod/BaTaO<sub>2</sub> N Nanoparticle Fabricated by a One-Step Ammonia Thermal Route for Remarkably Promoted Solar Hydrogen Production, *Adv. Mater.*, 2019, **31**, 1808185.
- 8 W. Huang, Q. He, Y. Hu, Y. Li, Molecular Heterostructures of Covalent Triazine Frameworks for Enhanced Photocatalytic Hydrogen Production, *Angew. Chem. Int. Edit.*, 2019, **58**, 8676-8680.
- 9 J. Sui, H. Liu, S. Hu, K. Sun, G. Wan, H. Zhou, X. Zheng, H.L. Jiang, A General Strategy to Immobilize Single-Atom Catalysts in Metal-Organic Frameworks for Enhanced Photocatalysis, *Adv. Mater.*, 2022, **34**, 2109203.
- 10 A. Zada, M. Humayun, F. Raziq, X. Zhang, Y. Qu, L. Bai, C. Qin, L. Jing, H. Fu, Exceptional Visible-Light-Driven Cocatalyst-Free Photocatalytic Activity of g-C<sub>3</sub>N<sub>4</sub> by Well Designed Nanocomposites with Plasmonic Au and SnO<sub>2</sub>, *Adv. Energy Mater.*, 2016, **6**, 1601190.
- 11 H.B. Zhang, S.W. Zuo, M. Qiu, S.B. Wang, Y.F. Zhang, J. Zhang, X.F.D. Luo, Direct probing of atomically dispersed Ru species over multi-edged TiO<sub>2</sub> for highly efficient photocatalytic hydrogen evolution, *Sci. Adv.*, 2020, **6**, eabb9823.
